# Supplementary material for: Comparison of the Proteome of Staphylococcus aureus Planktonic Culture and 3-Day Biofilm Reveals Potential Role of Key Proteins in Biofilm
Source: Preprints.org preprint supplement (doi:10.20944/preprints202405.1668.v2), 2024-05-29
Supplement: Supplementary file 1 [file Figure S1.docx]

**Figure S1**


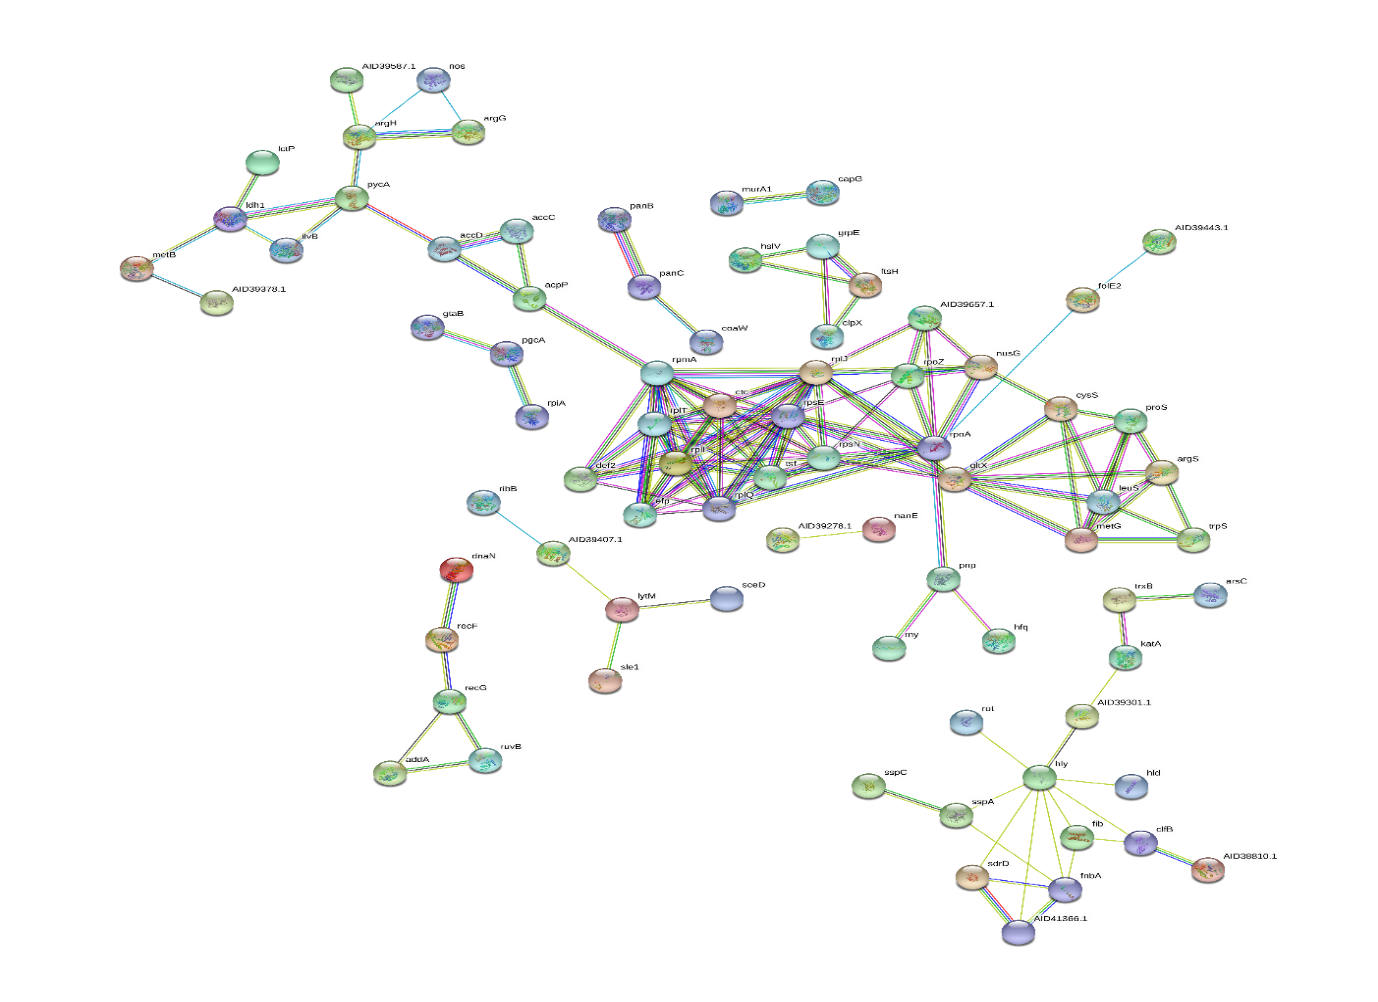


**Figure S1.** The network of DREPs of *S. aureus* biofilm was analysed by STRING software (v.10.0).High-confidence interactions (≥0.7) and omitted nodes that are not connected in the network in STRING software were selected for this study.
