# Supplementary material for: Comparison of the Proteome of Staphylococcus aureus Planktonic Culture and 3-Day Biofilm Reveals Potential Role of Key Proteins in Biofilm
Source: Preprints.org preprint supplement (doi:10.20944/preprints202405.1668.v2), 2024-05-29
Supplement: Supplementary file 2 [file Table S1.docx]

**Table S1.** Primers used in this study

| **Gene Name** | **Primer name** | **Primer sequence (5’-3’)** | **Position in gene** | **PCR size (bp)** | **Found in**  ***S. aureus* ATCC 25923 genome** |
| --- | --- | --- | --- | --- | --- |
| HysA | hysA F | TCTTCTTAGGAACTGGCATT | 1727-1839 | 113 | Yes |
|  | hysA R | GGTTGTTTGCGTATCATCTT |
| SA0914 | SA0914 F | ATTGCGATGATGCTATTTA | 1124-1207 | 84 | Yes |
|  | SA0914 R | GGCGCTCATACACAGGTTC |
| Prs | prs F | TCAGGACCGGCTAAAGAAC | 784-918 | 55 | Yes |
|  | prs R | AGCTTGTGCGATTAAACCAG |
| SdhB | sdhB F | GCCACGTATGCCAGAGAAA | 462-599 | 60 | Yes |
|  | sdhB R | CGAACTTGCGAGATTGCTT |
|  |  |  |  |  |  |
| Pyc | pyc F | TCGTACAACGGCTATCAAGG | 366-480 | 60 | Yes |
|  | pyc R | AATCATTAGCGGGAAACCAG |  |  |  |
| 16s rRNA | Staphy_16sF | GGCGAAGGCGRCTTTCTGG | 704-720 | 95 | Yes |
|  | Staphy_16sR | CGTTTACGGCGTGGACT | 782-798 |  |  |
