# Supplementary material for: Comparison of the Proteome of Staphylococcus aureus Planktonic Culture and 3-Day Biofilm Reveals Potential Role of Key Proteins in Biofilm
Source: Preprints.org preprint supplement (doi:10.20944/preprints202405.1668.v2), 2024-05-29
Supplement: Supplementary file 5 [file Table S4.docx]

**Table S4.** Relative correlation of selected qPCR gene expression data to TMT protein expression data in 3-day biofilm in comparison to planktonic culture. * FC denotes fold change

|  |  |  | **TMT** | **qPCR** |
| --- | --- | --- | --- | --- |
| **Accession ID** | **Protein Name** | **Gene Name** | **3-day biofilm**  **(FC)*** | **3-day biofilm**  **(FC)*** |
| AIO21839.1 | Hyaluronate lyase | hysA | 2.503 | 0.047 |
| AIO20660.1 | chitinase | SA0914 | 0.118 | 1.528 |
| AIO20645.1 | glutamyl endopeptidase | sspA | 0.152 | 0.010 |
| AIO20712.1 | pyruvate carboxylase | pyc | 0.425 | 0.391 |
| AIO20749.1 | Succinate dehydrogenase | sdhB | 0.452 | 1.10 |
